# Supplementary material for: Nematic 2,5-disubstituted thiophenesElectronic supplementary information (ESI) available: extensive synthetic information. See http://www.rsc.org/suppdata/jm/b2/b202073b/
Source: Royal Society of Chemistry journal article supplement (doi:10.1039/b202073b), 2002-07-16
Supplement: b202073b.doc [file b202073b.doc]

**Synthesis**

**2,5**-***bis*(4**-**Pentylphenyl)thiophene 43**.A mixture of 2,5-dibromothiophene (2.00 g, 0.0083 mol), 4-pentylphenyleneboronic acid (3.82 g, 0.0198.0 mol), *tetrakis*(triphenylphosphine) palladium (0) (0.08 g), 2M sodium carbonate solution (50 cm3) and dimethylformamide (100 cm3) was heated under reflux overnight. The work-up and purification were as described for 2-(4-methoxyphenyl)-5-propylthiophene using a 1:1 dichloromethane:hexane mixture followed by recrystallisation from ethanol to yield 0.80 g (26%) of the desired product, see Table 5 for the liquid crystalline transition temperatures of **43**. 0.90 (6H, t), 1.30 (4H, sext), 1.37 (4H, quin), 1.63 (4H, quin), 2.61 (4H, t), 7.19 (4H, d), 7.23 (2H, s), 7.53 (4H, d). IR max/cm-1: 2931, 2857, 1501, 1460, 1125, 834, 800, 735. MS *m/z*: 376 (M+, M100), 333, 319, 262.

**1,4**-***bis*[(5**-**pentylthiophen**-**2**-**yl)ethynyl]benzene** **44**. A solution of 1,4-diethynylbenzene (0.5 g, 0.0040 mol) in tetrahydrofuran (10 cm3) was added dropwise to a stirred mixture of 2-iodo-5-pentylthiophene (2.22 g, 0.0008 mol), *bis*(triphenylphosphine)palladium(II) chloride (0.06 g, 0.0008 mol), copper iodide (0.03 g, 0.0002 mol), trimethylamine (10 cm3) in tetrahydorfuran (50 cm3). The reaction mixture was stirred at room temperature for 3 hrs, poured onto water (200 cm3) and extracted into dichloromethane (3 x 50 cm3). The combined organic extracts were washed with water (200 cm3), dried (MgSO4), filtered and evaporated under reduced pressure. The residue was purified by column chromatography on silica gel using hexane as eluent and recrystallisation from ethanol to yield 0.31 g (18 %) of the desired product, see Table 5 for the liquid crystalline transition temperatures of **44**. 1H NMR (CDCl3) H: 0.89 (6H, t), 1.29 (4H, sext), 1.37 (4H, quin), 1.66 (4H, quintet), 2.78 (4H, t), 6.70 (2H, dt), 7.11 (2H, d), 7.44 (4H, s). IR max/cm-1: 2933, 2198, 1540, 1510, 1463, 1213, 1114, 840, 798, 725, 510. MS *m/z*: 430 (M+, M100), 373, 316.

**2**-**(4**-**Methoxyphenyl)thiophene**. A mixture of *tetrakis*(triphenylphosphine)palladium (0) (4.62 g, 0.0040 mol) was added to a stirred solution of 2-iodothiophene (15.96 g, 0.0760 mol), 4-methoxyphenylene boronic acid (12.77 g, 0.0840 mol), 20% potassium carbonate solution (50 cm3) and 1,2-dimethoxyethane (50 cm3) was heated under reflux for 1 h. The work-up and purification were as described for 2-(4-methoxyphenyl)-5-propylthiophene using a 1:1 hexane/dichloromethane mixture as the eluent followed by recrystallisation from hexane to yield 3.65 g (25.3%) of the desired product. Melting point /°C: 105-107. Lit.: 106-107. [27] 1H NMR (CDCl3) H: 3.82(3H, s), 6.70 (1H, dd), 6.90 (2H, d), 7.03 (1H, dd), 7.17 (2H, d), 7.22 (1H, dd). IR max/cm-1: 2965, 2839, 1606, 1500, 1427, 1294, 1246, 1183, 1031, 826, 700. MS *m/z*: 190 (M+), 175, 107.

2-Heptyl-5-(4-methoxyphenyl)thiophene. *n*-Butyllithium (7.4 cm3, 2.5 M, 0.0184 mol) was added to a cooled (-50 °C), stirred solution of TMEDA (2.8 cm3, 0.0184 mol) in THF (150 cm3). After 5 min, 2-(4-methoxyphenyl)thiophene (3.17 g, 0.0167 mol) was added and stirred for a further 30 min. 1-bromoheptane (3.46 g, 0.0193 mol) was added dropwise, maintaining a temperature of -40 °C throughout the addition. After 1 h, the mixture was allowed to warm to room temperature overnight. The reaction mixture was added to a 20% hydrochloric acid solution (100 cm3) and stirred for 1 h. The crude product was extracted into ether (3  100 cm3). The combined organic extracts were washed with brine (2  100 cm3) and dried (MgSO4). After filtration, the solvent was removed under reduced pressure and the residue was purified by column chromatography on silica gel using a 2:1 hexane/dichloromethane mixture as the eluent followed by recrystallisation from ethanol to yield 2.93 g (59.8%) of the desired product. Melting point. /°C: 68-69. 1H NMR (CDCl3) H: 0.89 (3H, t), 1.24-1.43 (8H, m), 1.68 (2H, quint), 2.80 (2H, t), 3.82 (3H, s), 6.70 (1H, d), 6.89 (2H, d), 7.00 (1H, d), 7.48 (2H, d). IR max/cm-1: 2959, 2927, 2852, 1609, 1513, 1467, 1290, 1251, 1178, 1033, 825, 794. MS *m/z*: 288 (M+), 203, 188.

4-(5-Heptylthien-2-yl)phenol. Boron tribromide (20.0 cm3, 1.0M, 0.0200 mol) was added dropwise to a cooled (0 °C) stirred solution of 2-heptyl-5-(4-methoxyphenyl)thiophene (2.88 g, 0.0100 mol) in dichloromethane (50 cm3). The reaction mixture was stirred at room temperature overnight, then worked-up and purified as described for 4-(5-propylthien-2-yl)phenol to yield 1.64 g (59.9%) of the desired product. Melting point. /°C: 107-108. 1H NMR (CDCl3) H: 0.88 (3H, t), 1.29-1.36 (8H, m), 1.68 (2H, quint), 2.79 (2H, t), 4.73 (1H, s), 6.70 (1H, d), 6.81 (2H, d), 6.99 (1H, d), 7.43 (2H, d). IR max/cm-1: 3326, 2960, 2976, 2853, 1612, 1551, 1437, 1247, 827, 797. MS *m/z*: 274 (M+), 189.

**2**-**Pentylthiophene**-**5**-**carboxylic acid**. A solution of 2-pentylthiophene (5.00 g, 0.0300 mol) in diethyl ether (20 cm3) was added dropwise to a solution of butyl lithium (2.5M, 100 cm3) at 0 C. The reaction mixture was heated under reflux for1 h and then poured onto a mixture of cardice and diethyl ether (100 cm3). The lithium salt of 2-pentylthiophene-5-carboxylic acid formed was taken up in water and the resultant solution acidified with conc. hydrochloric acid (10 cm3) and stirred at 0 C for 1 h. The resultant precipitate was filtered off, washed with water, recrystallised from petroleum spirit [bp 40 - 60 C] and dried *in vacuo* (P2O5) to yield the desired product 4.2 g (65%), mp 70 C. Lit. 70 C.35 1H NMR (CDCl3) H: 0.89 (3H, t), 1.25-1.39 (4H, m), 1.72 (2H, quint), 2.85 (2H, t), 6.81 (1H, d), 7.72 (1H, d), 10.75-12.25 (1H, bp). IR (KBr) *v*max/cm-1: 2962, 1672, 1462, 1343, 1285, 1111, 849, 756. Ms *m/z*: 198 (M+), 141 (M 100), 113, 97.

4-(5-Butylthiophen-2-yl)phenyl 5-pentylthiophene-2-carboxylate 9. A solution of DCC (0.28 g, 0.0013 mol) in dichloromethane (10 cm3) was added to a solution of 2-pentylthiophene-5-carboxylic acid, (0.25 g, 0.0011 mol), 4-(5-butylylthien-2-yl)phenol (0.22 g, 0.0011 mol) and DMAP (0.06 g, 0.0002 mol) in dichloromethane (10 cm3), at room temperature. The reaction mixture was stirred overnight, filtered and purified by column chromatography on silica gel using a 1:1 hexane/dichloromethane mixture as the eluent and recrystallisation from ethanol to yield 0.26 g (56.3%) of the desired product, see Tables 8-10 for the transition temperatures of this ester 9 and other esters 10-42 prepared by this general procedure. 1H NMR (CDCl3) H: 0.93 (6H, t), 1.39 (6H, m), 1.65-1.73 (4H, m), 2.82 (2H, t), 2.88 (2H, t), 6.74 (1H, d), 6.86 (1H, d), 7.09 (1H, d), 7.19 (2H, d), 7.57 (2H, d), 8.21 (1H, d). IR max/cm-1: 2867, 1719, 1509, 1453, 1281, 1210, 1059, 743.MS *m/z*: 412 (M+), 181 (M 100), 96, 58. CHNS: % Expected, C 69.86, H 6.84, S 15.54. % Found, C 70.00, H 6.97, S 15.41.

5-(4-Methoxyphenyl)thiophene-2-carbonitrile. *Tetrakis*(triphenylphosphine)palladium (0) (0.42 g, 0.0004 mol) was added to a stirred solution of 5-bromothiophene-2-carbonitrile (4.88 g, 0.0313 mol), 4-methoxyphenylene boronic acid (5.72 g, 0.0376 mol) in a mixture of 20% sodium carbonate solution (50 cm3) and 1,2-dimethoxyethane (100 cm3). The reaction mixture was heated under reflux overnight, worked-up and purified as described for 2-(4-methoxyphenyl)-5-propylthiophene using a 9:1 hexane/ethyl acetate mixture as the eluent to yield 4.20 g (62.4%) of the desired product. Melting point /°C: 111-112. 1H NMR (CDCl3) H: 3.85 (3H, s), 6.95 (2H, d), 7.16 (1H, d), 7.53 (2H, d), 7.56 (1H, d). IR max/cm-1: 2215, 1605, 1440, 1295, 1260, 1180, 1025, 840, 820, 520. MS *m/z*: 215 (M+), 200.

5-(4-Hydroxyphenyl)thiophene-2-carbonitrile. Boron tribromide (38.0 cm3, 1.0*M*, 0.0380 mol) was added dropwise to a stirred solution of 5-(4-methoxyphenyl)thiophene-2-carbonitrile (4.00 g, 0.0186 mol) in dichloromethane (50 cm3) at 0 °C. The reaction mixture was stirred at room temperature overnight, worked-up and purified as described for 4-(5-propylthien-2-yl)phenol using a 9:1 hexane/ethyl acetate mixture as the eluent to yield 1.36 g (36.4%) of the desired product. Melting point /°C: 201-202. 1H NMR (CDCl3) H: 6.90 (2H, d), 7.13 (1H, d), 7.44 (2H, d), 7.55 (1H, d), 9.04 (1H, s). IR max/cm-1: 3320, 2215, 1610, 1430, 1285, 1180, 1060, 855, 810, 520. MS *m/z*: 201(M+).

**4**-**(5**-**Cyanothien**-**2**-**yl)phenyl hexanoat**e **77**. A solution of DCC (0.21 g, 0.0010 mol) in dichloromethane (10 cm3) was added to a solution of hexanoic acid (0.12 g, 0.0010 mol), 5-(4-hydroxyphenyl)thiophene-2-carbonitrile (0.20 g, 0.0010 mol) and DMAP (0.02 g, 0.0002 mol) in dichloromethane (10 cm3), at room temperature. The reaction mixture was stirred overnight, filtered and purified as described for the ester **9** to yield 0.02 g (6.7%) of the desired product, see Table 8 for the transition temperatures of **77** and other esters **78**-**82** prepared by this procedure. 1H NMR (CDCl3) H: 0.94 (3H, t), 1.35-1.47 (4H, m), 1.77 (2H, quint), 2.58 (2H, t), 7.17 (2H, d), 7.24 (1H, d), 7.56 (1H, d), 7.58 (2H, d). IR max/cm-1: 2960, 2870, 2205, 1755, 1500, 1435, 1210, 1170, 1135, 1110, 830, 515. MS *m/z*: 299 (M+), 201, 99, 71.
